# Supplementary material for: Vertical Retrieval of AOD using SEVIRI data, Case Study: European Continent
Source: Copernicus journal article supplement (doi:10.5194/amt-2024-105), 2024-08-01
Supplement: Supplementary file 1 [file amt-2024-105-supplement.pdf]

# **Vertical Retrieval of AOD using SEVIRI data, Case Study: European Continent**

Maryam Pashayi<sup>1</sup>, Mehran Satari<sup>1</sup>, Mehdi Momeni Shahraki<sup>1</sup>

<sup>1</sup>Department of Geomatics Engineering, Faculty of Civil Engineering and Transportation, University of Isfahan,  
Isfahan, Iran

*Correspondence to:* Mehran Satari (sattari@eng.ui.ac.ir)

**Table S1.** Statistical Metrics for 16 Cases Using Various Combinations of Meteorological and Land Cover Features with  $B_i$  as Input Features for the XGB Model.

| XGB                     |    | MAE $\times 10^{-2}$  |                  |                  |                   |                    |                  |                  |                   |                    |                  |                  |                   |                    |                  |                  |                   |                    |                  |                  |                   |
|-------------------------|----|-----------------------|------------------|------------------|-------------------|--------------------|------------------|------------------|-------------------|--------------------|------------------|------------------|-------------------|--------------------|------------------|------------------|-------------------|--------------------|------------------|------------------|-------------------|
|                         |    | winter                |                  |                  |                   | spring             |                  |                  |                   | summer             |                  |                  |                   | autumn             |                  |                  |                   | annual             |                  |                  |                   |
| Features                | ID | AOD <sub>1.5</sub>    | AOD <sub>3</sub> | AOD <sub>5</sub> | AOD <sub>10</sub> | AOD <sub>1.5</sub> | AOD <sub>3</sub> | AOD <sub>5</sub> | AOD <sub>10</sub> | AOD <sub>1.5</sub> | AOD <sub>3</sub> | AOD <sub>5</sub> | AOD <sub>10</sub> | AOD <sub>1.5</sub> | AOD <sub>3</sub> | AOD <sub>5</sub> | AOD <sub>10</sub> | AOD <sub>1.5</sub> | AOD <sub>3</sub> | AOD <sub>5</sub> | AOD <sub>10</sub> |
| $B_i$                   | 1  | 2                     | 0.9              | 0.6              | 0.3               | 1.6                | 0.7              | 0.4              | 0.4               | 1.4                | 1                | 0.7              | 0.5               | 1.6                | 0.5              | 0.4              | 0.3               | 1.8                | 0.8              | 0.5              | 0.5               |
| $B_i, LC$               | 2  | 2                     | 0.9              | 0.6              | 0.3               | 1.6                | 0.7              | 0.5              | 0.4               | 1.4                | 1                | 0.7              | 0.5               | 1.6                | 0.5              | 0.4              | 0.3               | 1.8                | 0.8              | 0.5              | 0.5               |
| $B_i, P$                | 3  | 1.8                   | 0.5              | 0.4              | 0.3               | 1.6                | 0.7              | 0.4              | 0.4               | 1.2                | 0.7              | 0.4              | 0.4               | 3.6                | 0.9              | 0.4              | 0.2               | 1.6                | 0.6              | 0.4              | 0.4               |
| $B_i, T$                | 4  | 1.7                   | 0.4              | 0.3              | 0.2               | 1.5                | 0.6              | 0.3              | 0.3               | 1.1                | 0.6              | 0.4              | 0.3               | 1.5                | 0.5              | 0.2              | 0.2               | 1.4                | 0.5              | 0.3              | 0.3               |
| $B_i, Ws, Wd$           | 5  | 1.7                   | 0.4              | 0.2              | 0.1               | 1.5                | 0.6              | 0.3              | 0.2               | 1.1                | 0.6              | 0.3              | 0.2               | 1.5                | 0.4              | 0.2              | 0.1               | 1.4                | 0.5              | 0.3              | 0.2               |
| $B_i, LC, P$            | 6  | 2                     | 0.9              | 0.6              | 0.3               | 1.6                | 0.7              | 0.5              | 0.4               | 1.4                | 1                | 0.6              | 0.5               | 1.6                | 0.5              | 0.4              | 0.3               | 1.8                | 0.8              | 0.5              | 0.5               |
| $B_i, LC, T$            | 7  | 1.8                   | 0.5              | 0.4              | 0.3               | 1.6                | 0.7              | 0.4              | 0.4               | 1.2                | 0.7              | 0.5              | 0.4               | 1.6                | 0.5              | 0.2              | 0.2               | 1.6                | 0.6              | 0.4              | 0.4               |
| $B_i, LC, Ws, Wd$       | 8  | 1.7                   | 0.4              | 0.3              | 0.2               | 1.5                | 0.7              | 0.3              | 0.3               | 1.2                | 0.6              | 0.4              | 0.3               | 1.6                | 0.5              | 2                | 0.3               | 1.5                | 0.5              | 0.3              | 0.3               |
| $B_i, P, T$             | 9  | 1.8                   | 0.5              | 0.4              | 0.3               | 1.6                | 0.7              | 0.4              | 0.4               | 1.2                | 0.7              | 0.4              | 0.4               | 1.6                | 0.5              | 0.2              | 0.2               | 1.6                | 0.6              | 0.4              | 0.4               |
| $B_i, P, Ws, Wd$        | 10 | 1.7                   | 0.4              | 0.3              | 0.2               | 1.5                | 0.6              | 0.3              | 0.3               | 1.1                | 0.6              | 0.4              | 0.3               | 1.5                | 0.5              | 0.2              | 0.2               | 1.4                | 0.5              | 0.3              | 0.3               |
| $B_i, T, Ws, Wd$        | 11 | 1.7                   | 0.4              | 0.3              | 0.2               | 1.5                | 0.6              | 0.3              | 0.3               | 1.1                | 0.6              | 0.4              | 0.3               | 1.5                | 0.5              | 0.2              | 0.2               | 1.4                | 0.5              | 0.3              | 0.3               |
| $B_i, LC, P, T$         | 12 | 2                     | 0.9              | 0.6              | 0.3               | 1.6                | 0.7              | 0.5              | 0.4               | 1.4                | 1                | 0.6              | 0.5               | 1.6                | 0.5              | 0.4              | 0.3               | 1.8                | 0.8              | 0.5              | 0.5               |
| $B_i, LC, P, Ws, Wd$    | 13 | 1.8                   | 0.5              | 0.4              | 0.3               | 1.6                | 0.7              | 0.4              | 0.4               | 1.2                | 0.7              | 0.5              | 0.4               | 1.6                | 0.5              | 0.2              | 0.2               | 1.6                | 0.6              | 0.4              | 0.4               |
| $B_i, LC, T, Ws, Wd$    | 14 | 1.8                   | 0.5              | 0.4              | 0.3               | 1.6                | 0.7              | 0.4              | 0.4               | 1.2                | 0.7              | 0.5              | 0.4               | 1.6                | 0.5              | 0.2              | 0.2               | 1.6                | 0.6              | 0.4              | 0.4               |
| $B_i, P, T, Ws, Wd$     | 15 | 1.8                   | 0.5              | 0.4              | 0.3               | 1.6                | 0.7              | 0.4              | 0.4               | 1.2                | 0.7              | 0.4              | 0.4               | 1.6                | 0.5              | 0.2              | 0.2               | 1.6                | 0.6              | 0.4              | 0.4               |
| $B_i, LC, P, T, Ws, Wd$ | 16 | 2                     | 0.9              | 0.6              | 0.3               | 1.6                | 0.7              | 0.4              | 0.4               | 1.4                | 1                | 0.6              | 0.5               | 1.6                | 0.5              | 0.4              | 0.3               | 1.8                | 0.8              | 0.5              | 0.5               |
|                         |    | RMSE $\times 10^{-2}$ |                  |                  |                   |                    |                  |                  |                   |                    |                  |                  |                   |                    |                  |                  |                   |                    |                  |                  |                   |
| $B_i$                   | 1  | 5.2                   | 5.8              | 4.6              | 2.4               | 4.3                | 3.1              | 2.9              | 2.5               | 4.3                | 4                | 4                | 3.2               | 5.1                | 2.8              | 2.5              | 2.6               | 5.3                | 3.1              | 3.1              | 3.1               |
| $B_i, LC$               | 2  | 5.2                   | 5.7              | 4.6              | 2.4               | 4.3                | 3.1              | 2.9              | 2.5               | 4.5                | 4                | 3.5              | 3.1               | 5.1                | 2.8              | 2.5              | 2.6               | 5.3                | 3.1              | 3.1              | 3.1               |
| $B_i, P$                | 3  | 4.8                   | 3.2              | 2.2              | 2.2               | 4.3                | 3.1              | 2.3              | 2.3               | 3.8                | 2                | 2.2              | 2.8               | 1.2                | 5.1              | 3.1              | 2.2               | 4.7                | 2.4              | 2.3              | 2.9               |
| $B_i, T$                | 4  | 4.6                   | 2.9              | 2.3              | 1.9               | 4.1                | 2.8              | 2                | 1.7               | 3.6                | 2                | 2                | 2.5               | 4.7                | 2.8              | 1.8              | 2.5               | 4.3                | 2.2              | 1.6              | 2.4               |
| $B_i, Ws, Wd$           | 5  | 4.6                   | 2.6              | 2.3              | 1.2               | 4                  | 2.5              | 1.9              | 1                 | 3.6                | 2                | 1.6              | 1.7               | 4.7                | 2.4              | 1.8              | 1.7               | 4.2                | 2.1              | 1.5              | 1.5               |
| $B_i, LC, P$            | 6  | 5.2                   | 5.7              | 4.6              | 2.4               | 4.3                | 3.1              | 2.9              | 2.5               | 4.4                | 3.9              | 3.6              | 3.1               | 5.1                | 2.9              | 2.5              | 2.6               | 5.3                | 3.1              | 3.1              | 3.1               |
| $B_i, LC, T$            | 7  | 4.9                   | 3.1              | 3.1              | 2.2               | 4.4                | 3.1              | 2.5              | 2.4               | 4                  | 2.4              | 2.4              | 2.8               | 5                  | 2.9              | 2                | 2.5               | 4.8                | 2.4              | 2.4              | 3                 |
| $B_i, LC, Ws, Wd$       | 8  | 4.6                   | 2.8              | 2.3              | 1.9               | 4.1                | 2.8              | 2.1              | 1.8               | 3.6                | 2                | 2                | 2.6               | 4.7                | 2.7              | 1.8              | 2.6               | 4.3                | 2.2              | 1.6              | 2.3               |

|                         |    |     |     |     |     |     |     |     |     |     |     |     |     |     |     |     |     |     |     |     |     |
|-------------------------|----|-----|-----|-----|-----|-----|-----|-----|-----|-----|-----|-----|-----|-----|-----|-----|-----|-----|-----|-----|-----|
| $B_i, P, T$             | 9  | 4.8 | 3.2 | 3.1 | 2.2 | 4.3 | 3   | 2.3 | 2.3 | 3.8 | 2.3 | 2.2 | 2.8 | 4.9 | 2.8 | 2   | 2.4 | 4.7 | 2.4 | 2.3 | 2.9 |
| $B_i, P, Ws, Wd$        | 10 | 4.7 | 2.8 | 2.3 | 1.8 | 4.1 | 2.7 | 2.1 | 1.7 | 3.6 | 2   | 2   | 2.6 | 4.7 | 2.9 | 1.8 | 2.4 | 4.2 | 2.2 | 1.6 | 2.4 |
| $B_i, T, Ws, Wd$        | 11 | 4.7 | 2.9 | 2.3 | 1.9 | 4.1 | 2.8 | 2   | 1.7 | 3.6 | 2   | 2   | 2.5 | 4.7 | 2.8 | 1.8 | 2.5 | 4.3 | 2.2 | 1.6 | 2.4 |
| $B_i, LC, P, T$         | 12 | 5.2 | 5.7 | 4.6 | 2.4 | 4.3 | 3.1 | 2.9 | 2.5 | 4.4 | 3.9 | 3.6 | 3.1 | 5.1 | 2.9 | 2.5 | 2.6 | 5.3 | 3.1 | 3.1 | 3.1 |
| $B_i, LC, P, Ws, Wd$    | 13 | 5   | 3.1 | 3.1 | 2.2 | 4.4 | 3.1 | 2.5 | 2.3 | 4   | 2.4 | 2.5 | 2.9 | 4.9 | 2.9 | 2   | 2.4 | 4.8 | 2.5 | 2.4 | 2.9 |
| $B_i, LC, T, Ws, Wd$    | 14 | 4.9 | 3   | 3.1 | 2.2 | 4.4 | 3   | 2.5 | 2.4 | 4   | 2.4 | 2.4 | 2.8 | 5   | 2.9 | 2   | 2.5 | 4.8 | 2.4 | 2.4 | 3   |
| $B_i, P, T, Ws, Wd$     | 15 | 4.8 | 3.2 | 3.1 | 2.2 | 4.3 | 2.9 | 2.3 | 2.3 | 3.8 | 2.3 | 2.2 | 2.8 | 4.9 | 2.9 | 2   | 2.4 | 4.7 | 2.4 | 2.3 | 2.8 |
| $B_i, LC, P, T, Ws, Wd$ | 16 | 5.2 | 5.7 | 4.6 | 2.4 | 4.3 | 2.9 | 2.3 | 2.3 | 4.4 | 3.9 | 3.6 | 3.1 | 5.1 | 2.9 | 2.5 | 2.6 | 5.3 | 3.1 | 3.1 | 3.1 |

$R \times 10^{-2}$

|                         |    |    |    |    |    |    |    |    |    |    |    |    |    |    |    |    |    |    |    |    |    |
|-------------------------|----|----|----|----|----|----|----|----|----|----|----|----|----|----|----|----|----|----|----|----|----|
| $B_i$                   | 1  | 99 | 59 | 53 | 37 | 99 | 97 | 93 | 64 | 99 | 88 | 74 | 51 | 98 | 92 | 91 | 75 | 99 | 95 | 82 | 56 |
| $B_i, LC$               | 2  | 99 | 61 | 53 | 41 | 99 | 97 | 93 | 63 | 99 | 88 | 73 | 48 | 98 | 92 | 91 | 75 | 99 | 95 | 82 | 56 |
| $B_i, P$                | 3  | 99 | 95 | 90 | 55 | 99 | 97 | 96 | 71 | 99 | 98 | 93 | 68 | 77 | 59 | 81 | 91 | 99 | 98 | 93 | 68 |
| $B_i, T$                | 4  | 99 | 96 | 97 | 75 | 99 | 98 | 98 | 87 | 99 | 99 | 95 | 79 | 99 | 92 | 97 | 86 | 99 | 98 | 98 | 83 |
| $B_i, Ws, Wd$           | 5  | 99 | 98 | 96 | 94 | 99 | 99 | 98 | 98 | 99 | 99 | 97 | 94 | 99 | 96 | 97 | 97 | 99 | 99 | 98 | 95 |
| $B_i, LC, P$            | 6  | 99 | 61 | 53 | 41 | 99 | 97 | 93 | 63 | 99 | 88 | 73 | 52 | 98 | 92 | 91 | 75 | 99 | 95 | 82 | 56 |
| $B_i, LC, T$            | 7  | 99 | 96 | 90 | 56 | 99 | 97 | 96 | 64 | 99 | 98 | 91 | 66 | 99 | 91 | 96 | 83 | 99 | 98 | 92 | 64 |
| $B_i, LC, Ws, Wd$       | 8  | 99 | 96 | 96 | 76 | 99 | 98 | 98 | 85 | 99 | 98 | 95 | 76 | 99 | 93 | 97 | 80 | 99 | 98 | 98 | 83 |
| $B_i, P, T$             | 9  | 99 | 95 | 90 | 55 | 99 | 97 | 96 | 71 | 99 | 98 | 93 | 68 | 99 | 92 | 96 | 86 | 99 | 98 | 93 | 68 |
| $B_i, P, Ws, Wd$        | 10 | 99 | 96 | 96 | 77 | 99 | 98 | 97 | 87 | 99 | 98 | 95 | 75 | 99 | 91 | 97 | 86 | 99 | 98 | 98 | 82 |
| $B_i, T, Ws, Wd$        | 11 | 99 | 96 | 97 | 75 | 99 | 98 | 98 | 87 | 99 | 99 | 95 | 79 | 99 | 92 | 97 | 86 | 99 | 98 | 98 | 83 |
| $B_i, LC, P, T$         | 12 | 99 | 61 | 53 | 41 | 99 | 97 | 93 | 63 | 99 | 88 | 73 | 52 | 98 | 92 | 91 | 75 | 99 | 95 | 82 | 56 |
| $B_i, LC, P, Ws, Wd$    | 13 | 99 | 96 | 89 | 60 | 99 | 97 | 96 | 74 | 99 | 98 | 90 | 65 | 99 | 92 | 96 | 83 | 99 | 98 | 92 | 65 |
| $B_i, LC, T, Ws, Wd$    | 14 | 99 | 96 | 90 | 56 | 99 | 97 | 96 | 64 | 99 | 98 | 91 | 66 | 99 | 91 | 96 | 83 | 99 | 98 | 92 | 64 |
| $B_i, P, T, Ws, Wd$     | 15 | 99 | 95 | 90 | 55 | 99 | 97 | 96 | 71 | 99 | 98 | 93 | 68 | 99 | 92 | 96 | 86 | 99 | 98 | 93 | 68 |
| $B_i, LC, P, T, Ws, Wd$ | 16 | 99 | 61 | 53 | 41 | 99 | 97 | 96 | 71 | 99 | 88 | 73 | 52 | 98 | 92 | 91 | 75 | 99 | 95 | 82 | 56 |

$R^2 \times 10^{-2}$

|           |   |    |    |    |    |    |    |    |    |    |    |    |    |    |    |    |    |    |    |    |    |
|-----------|---|----|----|----|----|----|----|----|----|----|----|----|----|----|----|----|----|----|----|----|----|
| $B_i$     | 1 | 91 | 31 | 27 | 14 | 92 | 86 | 75 | 37 | 88 | 65 | 47 | 21 | 90 | 78 | 71 | 48 | 89 | 80 | 59 | 27 |
| $B_i, LC$ | 2 | 91 | 33 | 38 | 17 | 92 | 86 | 76 | 36 | 88 | 66 | 49 | 22 | 90 | 78 | 71 | 48 | 89 | 80 | 59 | 27 |
| $B_i, P$  | 3 | 93 | 79 | 67 | 30 | 92 | 87 | 84 | 45 | 91 | 88 | 80 | 39 | 49 | 29 | 56 | 63 | 91 | 88 | 77 | 36 |

|                          |    |    |    |    |    |    |    |    |    |    |    |    |    |    |    |    |    |    |    |    |    |
|--------------------------|----|----|----|----|----|----|----|----|----|----|----|----|----|----|----|----|----|----|----|----|----|
| $B_i$ , T                | 4  | 93 | 83 | 82 | 47 | 93 | 89 | 88 | 68 | 92 | 91 | 86 | 52 | 92 | 79 | 85 | 52 | 93 | 90 | 90 | 57 |
| $B_i$ , Ws, Wd           | 5  | 93 | 86 | 82 | 78 | 93 | 91 | 89 | 89 | 92 | 92 | 89 | 78 | 92 | 84 | 85 | 79 | 93 | 91 | 90 | 82 |
| $B_i$ , LC, P            | 6  | 91 | 33 | 28 | 17 | 92 | 86 | 76 | 36 | 88 | 66 | 48 | 26 | 90 | 78 | 71 | 48 | 89 | 80 | 59 | 27 |
| $B_i$ , LC, T            | 7  | 92 | 80 | 66 | 29 | 91 | 86 | 82 | 38 | 90 | 87 | 77 | 37 | 91 | 77 | 82 | 50 | 91 | 88 | 76 | 32 |
| $B_i$ , LC, Ws, Wd       | 8  | 93 | 84 | 81 | 50 | 93 | 88 | 87 | 65 | 92 | 91 | 86 | 47 | 92 | 79 | 84 | 47 | 93 | 90 | 89 | 58 |
| $B_i$ , P, T             | 9  | 93 | 79 | 67 | 30 | 92 | 87 | 84 | 45 | 91 | 88 | 80 | 39 | 91 | 78 | 82 | 56 | 91 | 88 | 77 | 36 |
| $B_i$ , P, Ws, Wd        | 10 | 93 | 84 | 81 | 52 | 93 | 89 | 87 | 69 | 92 | 91 | 86 | 48 | 92 | 77 | 85 | 54 | 93 | 90 | 90 | 57 |
| $B_i$ , T, Ws, Wd        | 11 | 93 | 83 | 82 | 47 | 93 | 89 | 88 | 64 | 92 | 91 | 86 | 52 | 92 | 79 | 85 | 52 | 93 | 90 | 90 | 57 |
| $B_i$ , LC, P, T         | 12 | 91 | 33 | 28 | 17 | 92 | 86 | 76 | 36 | 88 | 66 | 48 | 26 | 90 | 78 | 71 | 48 | 89 | 80 | 59 | 27 |
| $B_i$ , LC, P, Ws, Wd    | 13 | 92 | 80 | 67 | 32 | 92 | 86 | 82 | 47 | 9  | 87 | 75 | 37 | 91 | 77 | 82 | 56 | 91 | 87 | 76 | 34 |
| $B_i$ , LC, T, Ws, Wd    | 14 | 92 | 80 | 67 | 29 | 91 | 86 | 82 | 38 | 90 | 87 | 77 | 37 | 91 | 77 | 82 | 50 | 91 | 88 | 76 | 32 |
| $B_i$ , P, T, Ws, Wd     | 15 | 93 | 79 | 67 | 30 | 92 | 87 | 84 | 45 | 91 | 88 | 80 | 39 | 91 | 78 | 82 | 54 | 91 | 88 | 78 | 36 |
| $B_i$ , LC, P, T, Ws, Wd | 16 | 91 | 33 | 28 | 17 | 92 | 87 | 84 | 45 | 88 | 66 | 48 | 26 | 90 | 78 | 71 | 48 | 89 | 80 | 59 | 27 |

**Table S2.** Statistical Metrics for 16 Cases Using Various Combinations of Meteorological and Land Cover Features with  $B_i$  as Input Features for the RF Model.

| RF                 |    | $MAE \times 10^{-2}$ |                  |                  |                   |                    |                  |                  |                   |                    |                  |                  |                   |                    |                  |                  |                   |                    |                  |                  |                   |
|--------------------|----|----------------------|------------------|------------------|-------------------|--------------------|------------------|------------------|-------------------|--------------------|------------------|------------------|-------------------|--------------------|------------------|------------------|-------------------|--------------------|------------------|------------------|-------------------|
|                    |    | winter               |                  |                  |                   | spring             |                  |                  |                   | summer             |                  |                  |                   | autumn             |                  |                  |                   | annual             |                  |                  |                   |
| Features           | ID | AOD <sub>1.5</sub>   | AOD <sub>3</sub> | AOD <sub>5</sub> | AOD <sub>10</sub> | AOD <sub>1.5</sub> | AOD <sub>3</sub> | AOD <sub>5</sub> | AOD <sub>10</sub> | AOD <sub>1.5</sub> | AOD <sub>3</sub> | AOD <sub>5</sub> | AOD <sub>10</sub> | AOD <sub>1.5</sub> | AOD <sub>3</sub> | AOD <sub>5</sub> | AOD <sub>10</sub> | AOD <sub>1.5</sub> | AOD <sub>3</sub> | AOD <sub>5</sub> | AOD <sub>10</sub> |
| $B_i$              | 1  | 1.3                  | 1.2              | 0.8              | 0.4               | 0.7                | 0.4              | 0.5              | 0.6               | 0.5                | 1.4              | 1.2              | 0.8               | 0.5                | 0.3              | 0.4              | 0.4               | 0.7                | 1.1              | 0.8              | 0.6               |
| $B_i$ , LC         | 2  | 1.3                  | 1.2              | 0.8              | 0.4               | 0.7                | 0.4              | 0.5              | 0.6               | 0.5                | 1.4              | 1.2              | 0.8               | 0.5                | 0.3              | 0.4              | 0.4               | 0.7                | 1.1              | 0.8              | 0.6               |
| $B_i$ , P          | 3  | 1.2                  | 0.2              | 0.4              | 0.4               | 0.6                | 0.4              | 0.5              | 0.6               | 0.5                | 0.6              | 0.5              | 0.7               | 0.5                | 0.3              | 0.1              | 0.4               | 0.6                | 0.5              | 0.5              | 0.6               |
| $B_i$ , T          | 4  | 0.7                  | 0.2              | 0.1              | 0.3               | 0.6                | 0.4              | 0.2              | 0.4               | 0.5                | 0.5              | 0.3              | 0.5               | 0.5                | 0.3              | 0.1              | 0.4               | 0.6                | 0.4              | 0.2              | 0.4               |
| $B_i$ , Ws, Wd     | 5  | 0.6                  | 0.2              | 0.1              | 0.03              | 0.6                | 0.4              | 0.2              | 0.04              | 0.5                | 0.5              | 0.3              | 0.07              | 0.5                | 0.3              | 0.1              | 0.03              | 0.6                | 0.4              | 0.2              | 0.00              |
| $B_i$ , LC, P      | 6  | 1.3                  | 1.2              | 0.8              | 0.4               | 0.7                | 0.4              | 0.5              | 0.6               | 0.5                | 1.4              | 1.2              | 0.8               | 0.5                | 0.3              | 0.4              | 0.4               | 0.7                | 1.1              | 0.8              | 0.6               |
| $B_i$ , LC, T      | 7  | 0.8                  | 0.2              | 0.4              | 0.4               | 0.6                | 0.4              | 0.5              | 0.6               | 0.5                | 0.6              | 0.5              | 0.7               | 0.6                | 0.3              | 0.1              | 0.4               | 0.6                | 0.5              | 0.4              | 0.6               |
| $B_i$ , LC, Ws, Wd | 8  | 0.7                  | 0.2              | 0.1              | 0.3               | 0.6                | 0.4              | 0.2              | 0.4               | 0.5                | 0.5              | 0.3              | 0.5               | 0.6                | 0.3              | 0.1              | 0.4               | 0.6                | 0.4              | 0.2              | 0.4               |
| $B_i$ , P, T       | 9  | 1.2                  | 0.2              | 0.4              | 0.4               | 0.6                | 0.4              | 0.5              | 0.6               | 0.5                | 0.6              | 0.5              | 0.6               | 0.5                | 0.3              | 0.1              | 0.4               | 0.6                | 0.5              | 0.5              | 0.6               |
| $B_i$ , P, Ws, Wd  | 10 | 0.6                  | 0.2              | 0.1              | 0.3               | 0.6                | 0.4              | 0.2              | 0.4               | 0.5                | 0.5              | 0.3              | 0.5               | 0.5                | 0.3              | 0.1              | 0.4               | 0.6                | 0.4              | 0.2              | 0.4               |



|                          |    |    |    |    |    |    |    |    |    |    |    |    |    |    |    |    |     |    |    |    |    |
|--------------------------|----|----|----|----|----|----|----|----|----|----|----|----|----|----|----|----|-----|----|----|----|----|
| $B_i$ , LC, P            | 6  | 99 | 44 | 28 | 15 | 99 | 99 | 91 | 43 | 99 | 69 | 30 | 31 | 99 | 98 | 89 | 70  | 99 | 84 | 57 | 24 |
| $B_i$ , LC, T            | 7  | 99 | 98 | 87 | 37 | 99 | 99 | 86 | 48 | 99 | 97 | 91 | 45 | 99 | 99 | 99 | 72  | 99 | 98 | 88 | 26 |
| $B_i$ , LC, Ws, Wd       | 8  | 99 | 99 | 99 | 42 | 99 | 99 | 99 | 74 | 99 | 97 | 97 | 75 | 99 | 99 | 99 | 74  | 99 | 99 | 99 | 27 |
| $B_i$ , P, T             | 9  | 99 | 98 | 95 | 40 | 99 | 99 | 87 | 58 | 99 | 97 | 92 | 51 | 99 | 99 | 99 | 65  | 99 | 98 | 88 | 30 |
| $B_i$ , P, Ws, Wd        | 10 | 99 | 99 | 99 | 51 | 99 | 99 | 99 | 73 | 99 | 97 | 97 | 71 | 99 | 99 | 99 | 776 | 99 | 99 | 99 | 59 |
| $B_i$ , T, Ws, Wd        | 11 | 99 | 99 | 99 | 53 | 99 | 99 | 99 | 74 | 99 | 97 | 97 | 68 | 99 | 99 | 99 | 70  | 99 | 99 | 99 | 58 |
| $B_i$ , LC, P, T         | 12 | 99 | 44 | 28 | 15 | 99 | 99 | 91 | 43 | 99 | 69 | 30 | 31 | 99 | 98 | 89 | 70  | 99 | 84 | 57 | 24 |
| $B_i$ , LC, P, Ws, Wd    | 13 | 99 | 99 | 88 | 43 | 99 | 99 | 84 | 56 | 99 | 97 | 91 | 41 | 99 | 99 | 99 | 80  | 99 | 98 | 88 | 27 |
| $B_i$ , LC, T, Ws, Wd    | 14 | 99 | 98 | 87 | 37 | 99 | 99 | 86 | 48 | 99 | 97 | 91 | 45 | 99 | 99 | 99 | 72  | 99 | 98 | 88 | 26 |
| $B_i$ , P, T, Ws, Wd     | 15 | 99 | 98 | 85 | 40 | 99 | 99 | 87 | 58 | 99 | 97 | 92 | 51 | 99 | 99 | 99 | 65  | 99 | 98 | 88 | 30 |
| $B_i$ , LC, P, T, Ws, Wd | 16 | 99 | 44 | 28 | 15 | 99 | 99 | 91 | 43 | 99 | 69 | 30 | 31 | 99 | 98 | 89 | 70  | 99 | 84 | 57 | 24 |

$R^2 \times 10^{-2}$

|                          |    |    |    |    |    |    |    |    |    |    |    |    |    |    |    |    |    |    |    |    |    |
|--------------------------|----|----|----|----|----|----|----|----|----|----|----|----|----|----|----|----|----|----|----|----|----|
| $B_i$                    | 1  | 91 | 31 | 27 | 14 | 92 | 86 | 75 | 37 | 88 | 65 | 47 | 21 | 90 | 78 | 71 | 48 | 89 | 80 | 59 | 27 |
| $B_i$ , LC               | 2  | 91 | 33 | 38 | 17 | 92 | 86 | 76 | 36 | 88 | 66 | 49 | 22 | 90 | 78 | 71 | 48 | 89 | 80 | 59 | 27 |
| $B_i$ , P                | 3  | 93 | 79 | 67 | 30 | 92 | 87 | 84 | 45 | 91 | 88 | 80 | 39 | 49 | 29 | 56 | 63 | 91 | 88 | 77 | 36 |
| $B_i$ , T                | 4  | 93 | 83 | 82 | 47 | 93 | 89 | 88 | 68 | 92 | 91 | 86 | 52 | 92 | 79 | 85 | 52 | 93 | 90 | 90 | 57 |
| $B_i$ , Ws, Wd           | 5  | 99 | 98 | 99 | 98 | 99 | 98 | 98 | 99 | 99 | 95 | 96 | 99 | 99 | 98 | 98 | 97 | 99 | 97 | 98 | 99 |
| $B_i$ , LC, P            | 6  | 91 | 33 | 28 | 17 | 92 | 86 | 76 | 36 | 88 | 66 | 48 | 26 | 90 | 78 | 71 | 48 | 89 | 80 | 59 | 27 |
| $B_i$ , LC, T            | 7  | 92 | 80 | 66 | 29 | 91 | 86 | 82 | 38 | 90 | 87 | 77 | 37 | 91 | 77 | 82 | 50 | 91 | 88 | 76 | 32 |
| $B_i$ , LC, Ws, Wd       | 8  | 93 | 84 | 81 | 50 | 93 | 88 | 87 | 65 | 92 | 91 | 86 | 47 | 92 | 79 | 84 | 47 | 93 | 90 | 89 | 58 |
| $B_i$ , P, T             | 9  | 93 | 79 | 67 | 30 | 92 | 87 | 84 | 45 | 91 | 88 | 80 | 39 | 91 | 78 | 82 | 56 | 91 | 88 | 77 | 36 |
| $B_i$ , P, Ws, Wd        | 10 | 93 | 84 | 81 | 52 | 93 | 89 | 87 | 69 | 92 | 91 | 86 | 48 | 92 | 77 | 85 | 54 | 93 | 90 | 90 | 57 |
| $B_i$ , T, Ws, Wd        | 11 | 93 | 83 | 82 | 47 | 93 | 89 | 88 | 64 | 92 | 91 | 86 | 52 | 92 | 79 | 85 | 52 | 93 | 90 | 90 | 57 |
| $B_i$ , LC, P, T         | 12 | 91 | 33 | 28 | 17 | 92 | 86 | 76 | 36 | 88 | 66 | 48 | 26 | 90 | 78 | 71 | 48 | 89 | 80 | 59 | 27 |
| $B_i$ , LC, P, Ws, Wd    | 13 | 92 | 80 | 67 | 32 | 92 | 86 | 82 | 47 | 9  | 87 | 75 | 37 | 91 | 77 | 82 | 56 | 91 | 87 | 76 | 34 |
| $B_i$ , LC, T, Ws, Wd    | 14 | 92 | 80 | 67 | 29 | 91 | 86 | 82 | 38 | 90 | 87 | 77 | 37 | 91 | 77 | 82 | 50 | 91 | 88 | 76 | 32 |
| $B_i$ , P, T, Ws, Wd     | 15 | 93 | 79 | 67 | 30 | 92 | 87 | 84 | 45 | 91 | 88 | 80 | 39 | 91 | 78 | 82 | 54 | 91 | 88 | 78 | 36 |
| $B_i$ , LC, P, T, Ws, Wd | 16 | 91 | 33 | 28 | 17 | 92 | 87 | 84 | 45 | 88 | 66 | 48 | 26 | 90 | 78 | 71 | 48 | 89 | 80 | 59 | 27 |

**Table. S3.** Seasonal performance of proposed AOD profiling ML models.

|     | Targets     | Metrics | Annually | Winter | Spring | Summer | Autumn |
|-----|-------------|---------|----------|--------|--------|--------|--------|
| XGB | $AOD_{1.5}$ | $R$     | 0.994    | 0.995  | 0.994  | 0.993  | 0.99   |
|     |             | $MAE$   | 0.0144   | 0.0171 | 0.0149 | 0.0115 | 0.0154 |
|     | $AOD_3$     | $R$     | 0.988    | 0.976  | 0.988  | 0.99   | 0.962  |
|     |             | $MAE$   | 0.0052   | 0.0039 | 0.0064 | 0.0061 | 0.0045 |
|     | $AOD_5$     | $R$     | 0.982    | 0.962  | 0.981  | 0.967  | 0.97   |
|     |             | $MAE$   | 0.0026   | 0.0024 | 0.0029 | 0.0034 | 0.0023 |
|     | $AOD_{10}$  | $R$     | 0.951    | 0.944  | 0.98   | 0.941  | 0.973  |
|     |             | $MAE$   | 0.0017   | 0.0013 | 0.0016 | 0.0022 | 0.0013 |
| RF  | $AOD_{1.5}$ | $R$     | 0.995    | 0.997  | 0.994  | 0.996  | 0.997  |
|     |             | $MAE$   | 0.0057   | 0.0062 | 0.0062 | 0.0052 | 0.0054 |
|     | $AOD_3$     | $R$     | 0.986    | 0.991  | 0.99   | 0.975  | 0.988  |
|     |             | $MAE$   | 0.0037   | 0.0018 | 0.0044 | 0.0051 | 0.0027 |
|     | $AOD_5$     | $R$     | 0.991    | 0.993  | 0.991  | 0.979  | 0.989  |
|     |             | $MAE$   | 0.0016   | 0.001  | 0.0017 | 0.0026 | 0.0014 |
|     | $AOD_{10}$  | $R$     | 0.998    | 0.989  | 0.994  | 0.994  | 0.99   |
|     |             | $MAE$   | 0.0003   | 0.0003 | 0.0004 | 0.0007 | 0.0003 |
